# Supplementary material for: Infant and Young Child Feces Management and Enabling Products for Their Hygienic Collection, Transport, and Disposal in Cambodia
Source: PubMed Central journal article supplement (PMC4751965; doi:10.4269/ajtmh.15-0423), 2016-02-03
Supplement: SD9.pdf [file SD9.pdf]

SUPPLEMENTAL TABLE 1  
FGD sample products

Focus group participants interact with cloth diapers with removable, washable pads and snap or Velcro closures

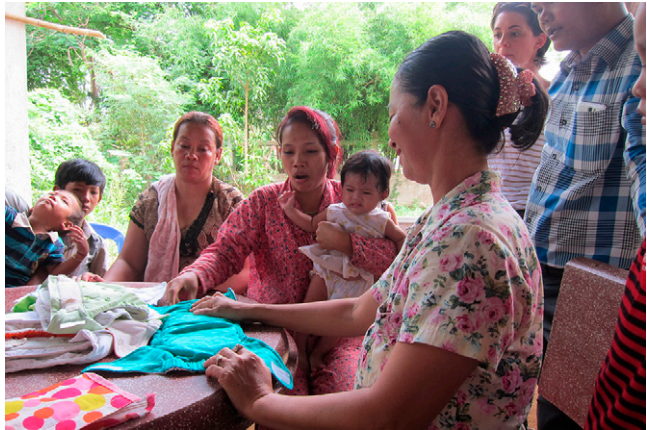

Focus group participants discuss the merits of children's potties

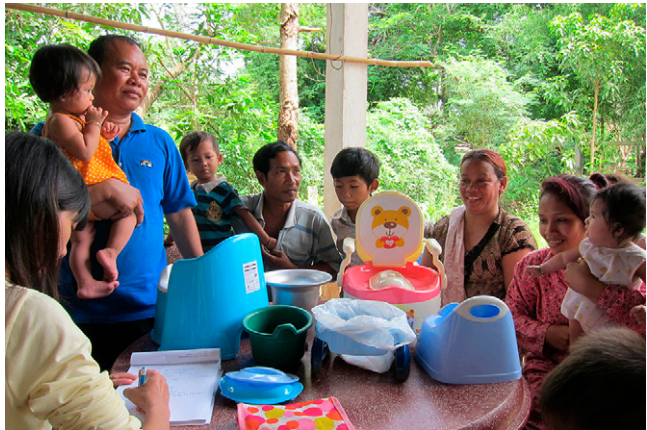

Focus group participants investigate the Safe Squat latrine cover, locally produced

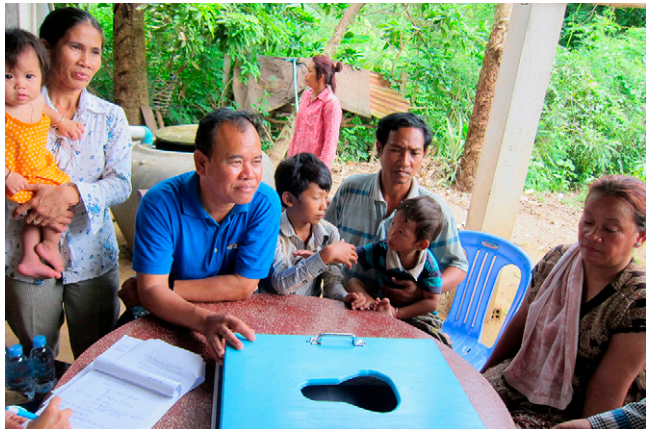

FGD = focus group discussions.
